# Supplementary material for: A Novel Glycolipid Biosurfactant Confers Grazing Resistance upon Pantoea ananatis BRT175 against the Social Amoeba Dictyostelium discoideum
Source: PubMed Central journal article supplement (PMC4863597; doi:10.1128/msphere.00075-15), 2016-01-20

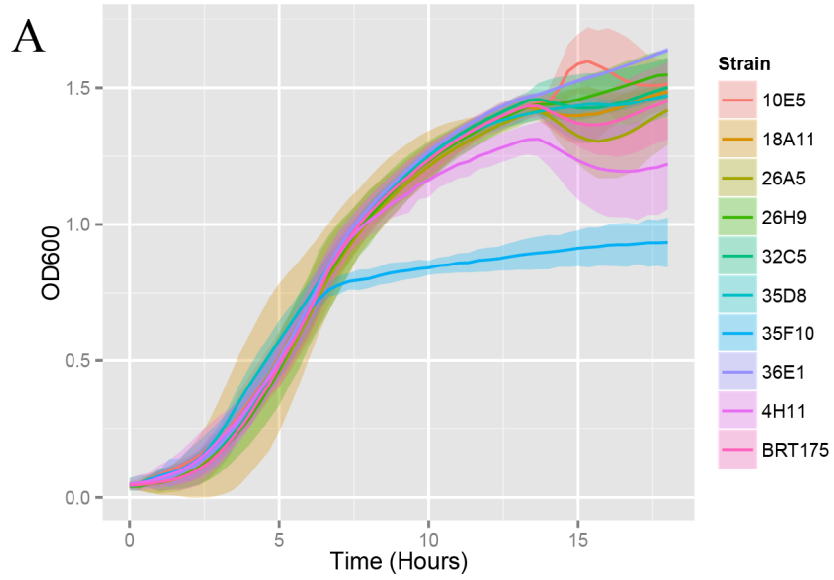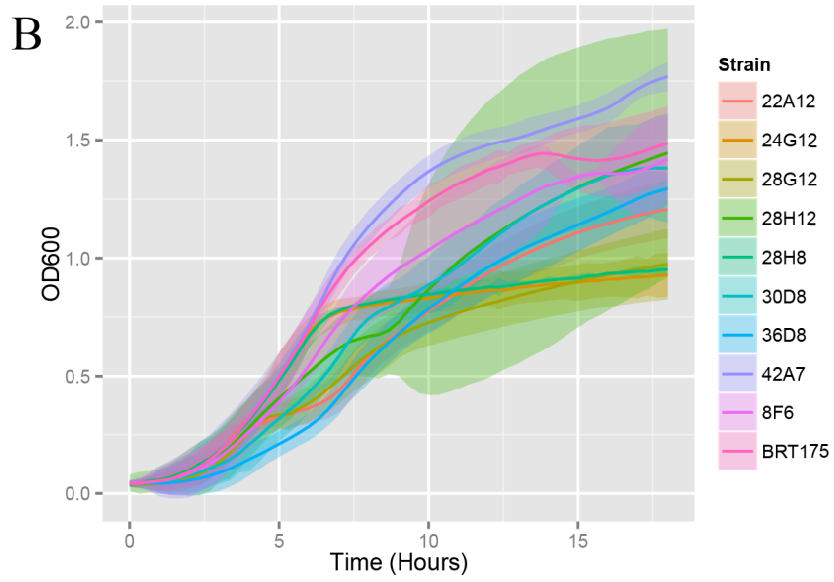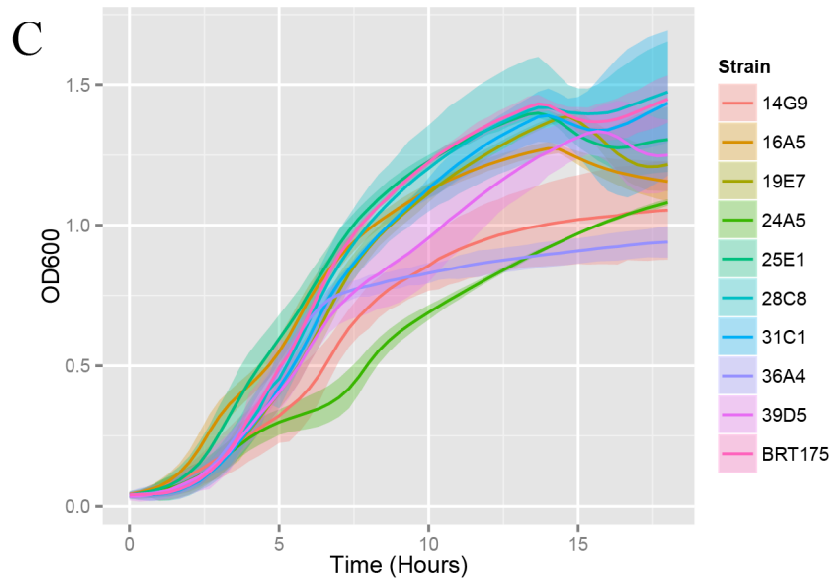

Supplement: sph001160041sf1.pdf [file sph001160041sf1.pdf]
